# Supplementary material for: A [2]pseudorotaxane based on a pillar[6]arene and its application in the construction of a metallosupramolecular polymer
Source: Royal Society of Chemistry journal article supplement (doi:10.1039/c9dt01713e), 2019-01-01
Supplement: c9dt01713e2.pdf [file c9dt01713e2.pdf]

## A [2]pseudorotaxane based on a pillar[6]arene and its application in the construction of metallosupramolecular polymer

Danyu Xia,<sup>\*a</sup> Xiaoqing Lv,<sup>a</sup> Kexian Chen,<sup>\*c</sup> and Pi Wang<sup>\*b</sup>

<sup>a</sup>Scientific Instrument Center, Shanxi University, Taiyuan, 030006, P. R. China; E-mail:

danyuxia@sxu.edu.cn

<sup>b</sup>Ministry of Education Key Laboratory of Interface Science and Engineering in Advanced  
Materials, Taiyuan University of Technology, Taiyuan, 030024, P.R. China; E-mail:

wangpi@tyut.edu.cn

<sup>c</sup>School of Food Science and Biotechnology, Zhejiang Gongshang University, Hangzhou,  
310018, PR China

### Electronic Supplementary Information (9 pages)

|     |                                                                                                                          |    |
|-----|--------------------------------------------------------------------------------------------------------------------------|----|
| 1.  | Materials and Methods                                                                                                    | S2 |
| 2.  | Variable-temperature <sup>1</sup> H NMR spectra of <b>P6</b> ⊃ <b>G</b>                                                  | S2 |
| 3.  | Partial 2D NOESY spectrum of <b>P6</b> ⊃ <b>G</b>                                                                        | S2 |
| 4.  | Stoichiometry and association constant determination for the complexation<br>between <b>P6</b> and <b>G</b>              | S3 |
| 5.  | Stoichiometry determination for the between the coordination between complex<br><b>P6</b> ⊃ <b>G</b> and Ag <sup>+</sup> | S5 |
| 6.  | <sup>1</sup> H NMR titration experiments of Ag <sup>+</sup> to <b>P6</b> ⊃ <b>G</b>                                      | S6 |
| 7.  | Diffusion coefficient D of <b>P6</b> + <b>G</b> and <b>P6</b> + <b>G</b> + Ag <sup>+</sup>                               | S6 |
| 8.  | DLS data of <b>P6</b> + <b>G</b> and <b>P6</b> + <b>G</b> + Ag <sup>+</sup>                                              | S7 |
| 9.  | Optical microscope image of the polypseudorotaxane                                                                       | S8 |
| 10. | Powder X-ray diffraction (XRD) analysis of the polypseudorotaxane                                                        | S8 |
|     | References                                                                                                               | S9 |

### 1. Materials and Methods:

Compound (**P6**)<sup>S1</sup> and (**G**)<sup>S2</sup> were synthesized according to literature procedures. All reagents were commercially available and used as supplied without further purification. Solvents were either employed as purchased or dried according to procedures described in the literature. NMR spectra were recorded with a Bruker Avance DMX 500 spectrophotometer or a Bruker Avance DMX 400 spectrophotometer. UV-vis spectra were taken on a Perkin-Elmer Lambda 35 UV-vis spectrophotometer. Dynamic light scattering was carried out on a Malvern Nanosizer S instrument at room temperature. XRD were performed with a Bruker D2 PHASER. Optical microscope image was made by a Bruker Multi-Mode 8.0 AFM instrument.

### 2. Variable-temperature <sup>1</sup>H NMR spectra of **P6**⊃**G**

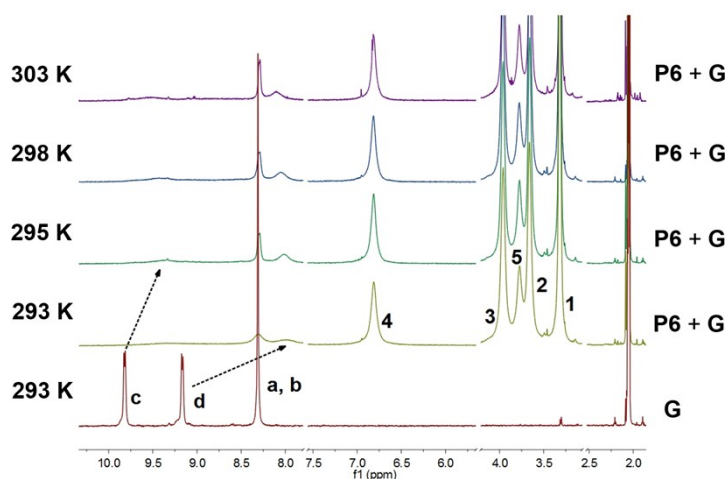

**Figure S1** Variable-temperature <sup>1</sup>H NMR spectra (500 MHz, CD<sub>3</sub>COCD<sub>3</sub>) of an equimolar solution of **P6** and **G** (5.00 mM).

### 3. Partial 2D NOESY spectrum of **P6**⊃**G**

2D NOESY experiment was employed to study the relative positions of the components in complex **P6**⊃**G**. NOE correlation signals were observed between protons H<sub>a</sub> and H<sub>b</sub> of **G** and proton H<sub>1</sub>, H<sub>2</sub>, H<sub>3</sub>, H<sub>4</sub> of **P6** (Figure S2, A, B, C, D) and between protons H<sub>d</sub> of **G** and proton H<sub>4</sub> of **P6** (Figure S2, E).

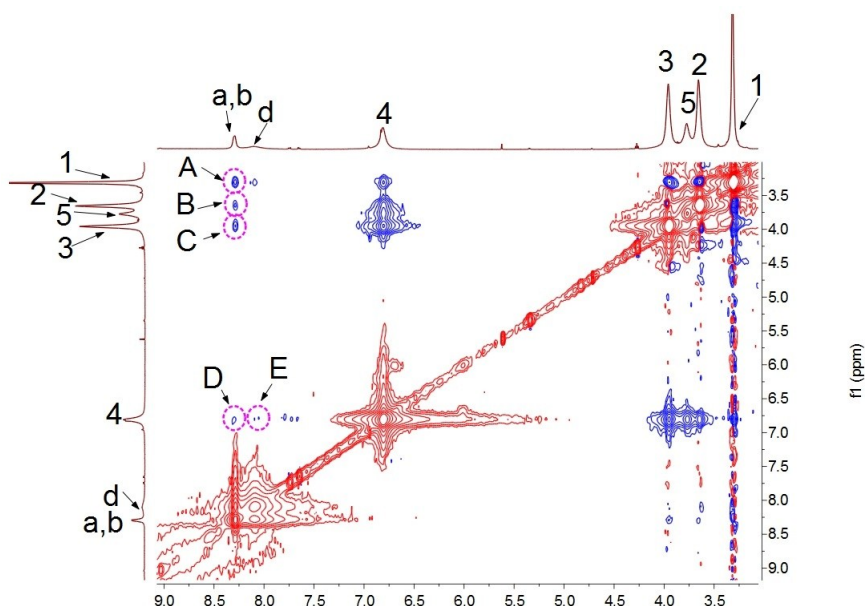

**Figure S2** Partial 2D NOESY spectrum (500 MHz,  $\text{CD}_3\text{COCD}_3$ , room temperature) of an equimolar mixture **P6** and **G** (5.00 mM).

#### 4. Stoichiometry and association constant determination for the complexation between **P6** and **G**

The association constant of complex **P6**⊃**G** was determined by probing the charge-transfer band of the complex by UV-vis spectroscopy and employing a titration method. Progressive addition of a solution with high guest **G** concentration ( $1.0 \times 10^{-2}$  M) and low host **P6** concentration ( $1.0 \times 10^{-4}$  M) to a solution with the same concentration of host **P6** resulted in an increase of the intensity of the charge-transfer band of the complex. Treatment of the collected absorbance data with a non-linear curve-fitting program afforded the corresponding association constant ( $K_a$ ): ( $3.58 \pm 0.13$ )  $\times 10^3 \text{ M}^{-1}$  for **P6**⊃**G** in acetone.

The non-linear curve-fitting was based on the equation:<sup>S3</sup>

$$A = (A_\infty/[H]_0) (0.5[G]_0 + 0.5([H]_0 + 1/K_a) - (0.5 ([G]_0^2 + (2[G]_0(1/K_a - [H]_0)) + (1/K_a + [H]_0)^2)^{0.5})) \quad (\text{Eq. S1})$$

Where  $A$  is the absorption intensity of the charge-transfer band at  $[G]_0$ ,  $A_\infty$  is the absorption intensity of the charge-transfer band when the host is completely complexed,  $[H]_0$  is the fixed initial concentration of the host **P6**, and  $[G]_0$  is the varying concentration of the guest **G**.

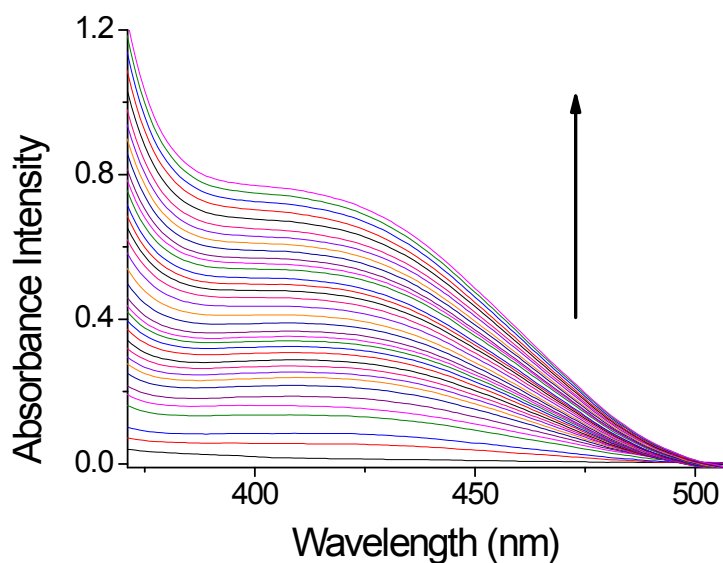

**Figure S3** The absorption spectral changes of **P6** ( $1.0 \times 10^{-4}$  M) upon addition of **G**. The concentrations of **G** were 0.00 mM, 0.00999 mM, 0.00200 mM, 0.0398 mM, 0.0498 mM, 0.0596 mM, 0.0794 mM, 0.0990 mM, 0.119 mM, 0.138 mM, 0.157 mM, 0.177 mM, 0.196 mM, 0.215 mM, 0.234 mM, 0.253 mM, 0.291 mM, 0.329 mM, 0.366 mM, 0.403 mM, 0.440 mM, 0.476 mM, 0.512 mM, 0.548 mM, 0.584 mM, 0.619 mM, 0.672 mM, 0.724 mM, 0.775 mM, 0.842 mM, 0.909 mM, 0.975 mM, 1.040 mM and 1.170 mM.

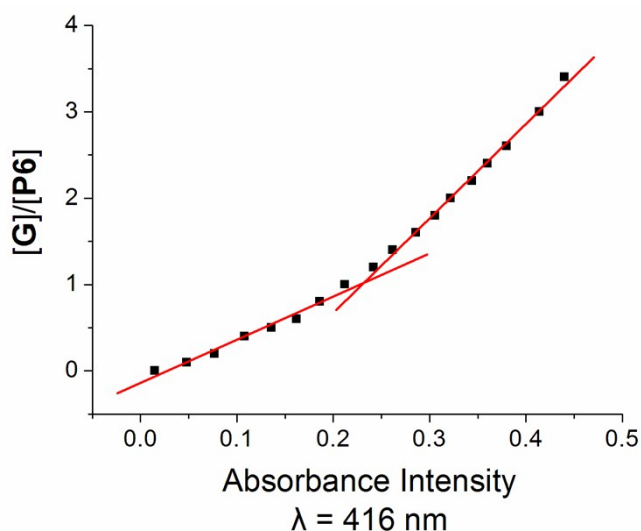

**Figure S4** Mole ratio plot for the complexation between **P6** and **G**, indicating a 1:1 stoichiometry.

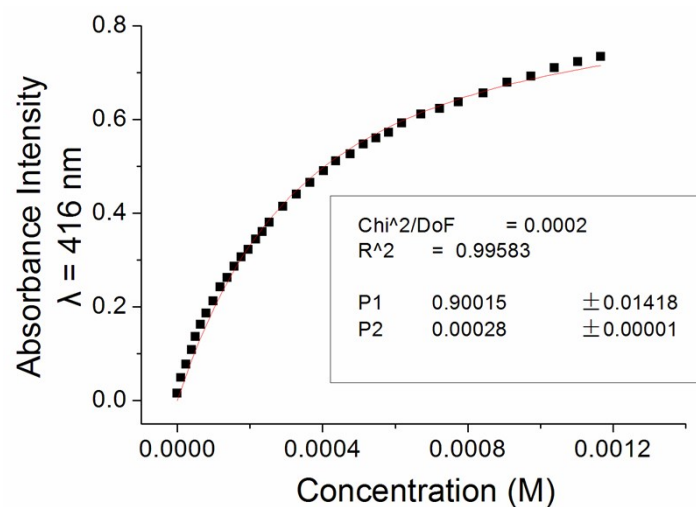

**Figure S5** The absorbance intensity changes at  $\lambda = 416$  nm upon addition of **G** (from 0 to  $1.17 \times 10^{-3}$  M). The red solid line was obtained from the non-linear curve-fitting using Eq. S1.

5. Stoichiometry determination for the between the coordination between complex **P6**⊃**G** and  $\text{Ag}^+$

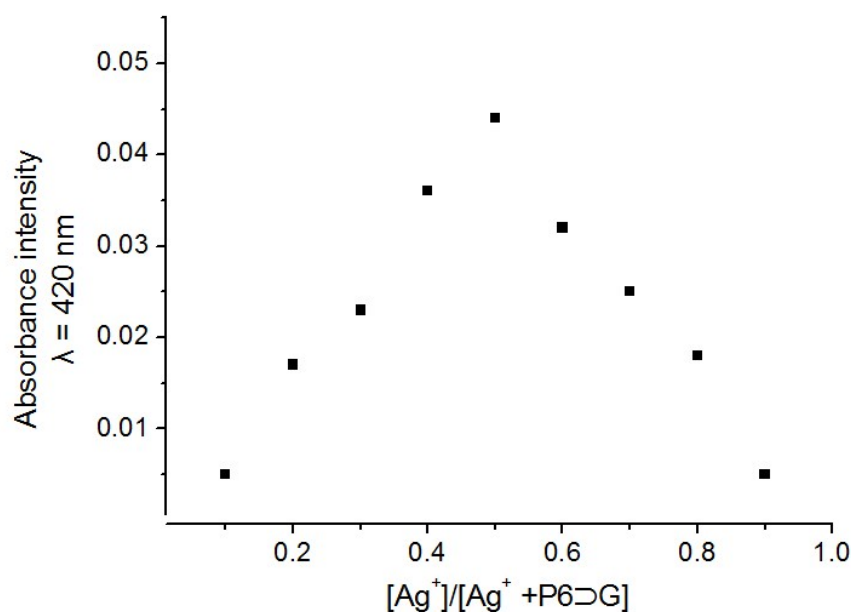

**Figure S6** Job plot for the coordination between  $\text{Ag}^+$  and **P6**⊃**G**, indicating a 1:1 stoichiometry. The total concentration of  $\text{Ag}^+$  and **P6**⊃**G** was 0.0500 mM. The concentration of  $\text{Ag}^+$  was from 0.00500 mM to 0.0450 mM.

6.  $^1\text{H}$  NMR titration experiments of  $\text{Ag}^+$  to  $\text{P6} \supset \text{G}$

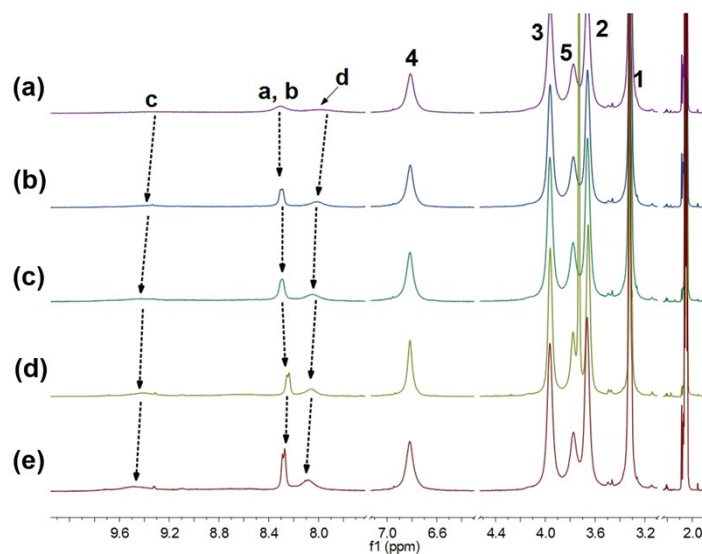

**Figure S7** Partial  $^1\text{H}$  NMR spectra (500 MHz,  $\text{CD}_3\text{COCD}_3$ , room temperature) of equimolar mixture of **P6** + **G** at a concentration of 5.00 mM with successive addition of  $\text{AgSbF}_6$ : a) 0 equiv; b) 0.2 equiv; c) 0.4 equiv; d) 0.8 equiv; e) 1.0 equiv. of  $\text{AgSbF}_6$ .

7. Diffusion coefficient  $D$  of **P6** + **G** and **P6** + **G** +  $\text{Ag}^+$

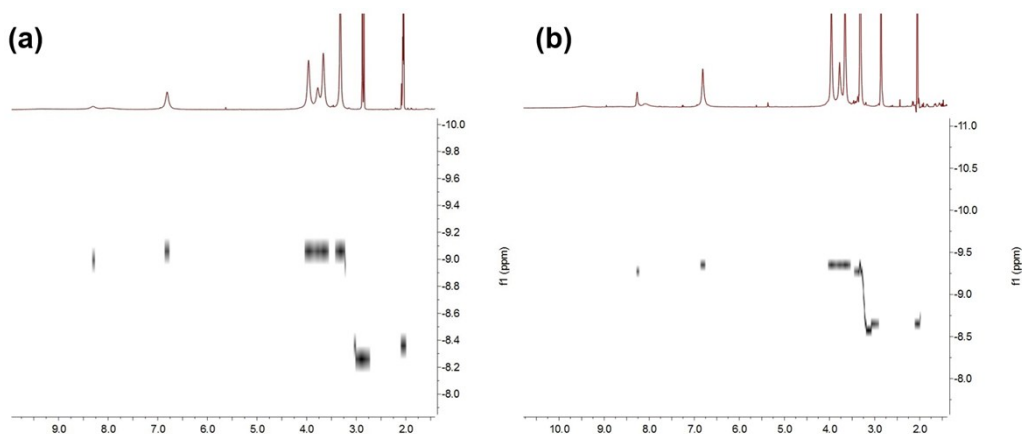

**Figure S8** 2D DOSY Spectra (500 MHz,  $\text{CD}_3\text{COCD}_3$ , room temperature,): (a) equimolar mixture of **P6** + **G** (5.00 mM); (b) equimolar mixture of **P6** + **G** +  $\text{Ag}^+$  (5.00 mM).

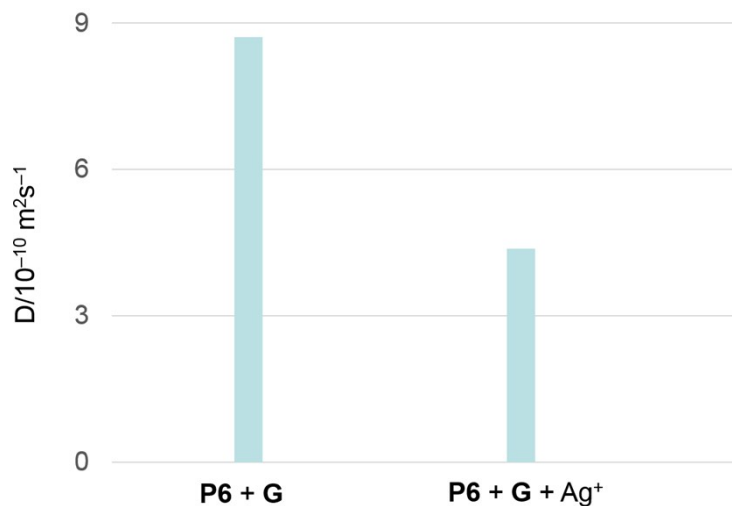

**Figure S9** Concentration dependence of diffusion coefficient  $D$  (500 MHz,  $\text{CD}_3\text{COCD}_3$ , room temperature) of equimolar mixtures of **P6 + G** and **P6 + G + Ag<sup>+</sup>** (5.00 mM).

#### 8. DLS data of **P6 + G** and **P6 + G + Ag<sup>+</sup>**

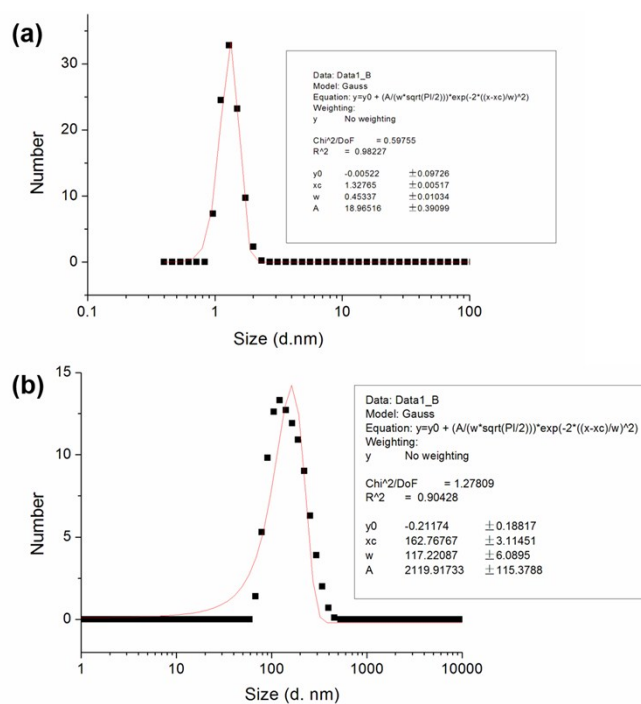

**Figure S10** DLS data: (a) **P6+G** (5.00 mM); (b) **P6+G** (5.00 mM) and **Ag<sup>+</sup>** (5.00 mM) in acetone. The red solid lines were obtained from the non-linear curve-fitting using Gaussian distribution.

9. Optical microscope images of the polypseudorotaxane

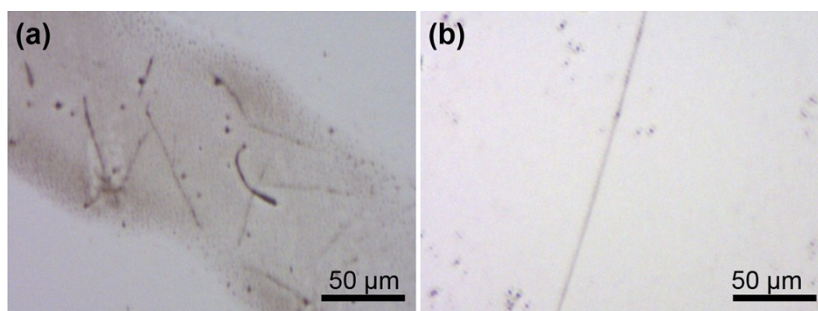

**Figure S11** Optical microscope images of the polypseudorotaxane.

10. Powder X-ray diffraction analysis of the polypseudorotaxane

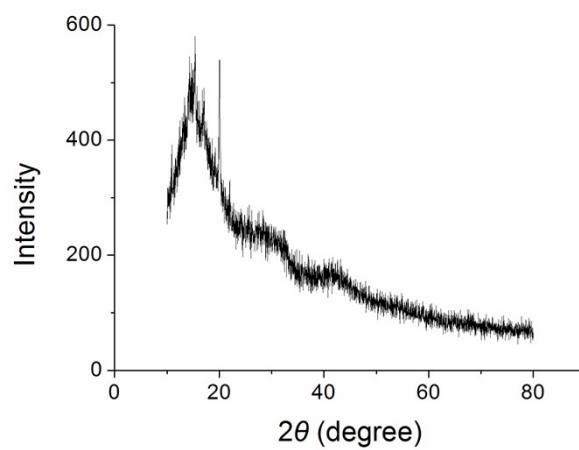

**Figure S12** Powder X-ray diffraction analysis of the polypseudorotaxane.

*References:*

- S1. X. Chi, M. Xue, Y. Ma, X. Yan and F. Huang, *Chem. Commun.*, 2013, **49**, 8175–8177.
- S2. F. Biedermann, O. A. Scherman, *J. Phys. Chem. B*, 2012, **116**, 2842–2849
- K. A. Connors, *Binding Constants*; Wiley: New York, 1987; P. S. Corbin, Ph.D. Dissertation, University of Illinois at Urbana-Champaign, Urbana, IL, 1999; P. R. Ashton, R. Ballardini, V. Balzani, M. Belohradsky, M. T. Gandolfi, D. Philp, L. Prodi, F. M. Raymo, M. V. Reddington, N. Spencer, J. F. Stoddart, M. Venturi and D. J. Williams, *J. Am. Chem. Soc.*, 1996, **118**, 4931–4951.
- S3. F. Biedermann, O. A. Scherman, *J. Phys. Chem. B*, 2012, **116**, 2842–2849
- K. A. Connors, *Binding Constants*; Wiley: New York, 1987; P. S. Corbin, Ph.D. Dissertation, University of Illinois at Urbana-Champaign, Urbana, IL, 1999; P. R. Ashton, R. Ballardini, V. Balzani, M. Belohradsky, M. T. Gandolfi, D. Philp, L. Prodi, F. M. Raymo, M. V. Reddington, N. Spencer, J. F. Stoddart, M. Venturi and D. J. Williams, *J. Am. Chem. Soc.*, 1996, **118**, 4931–4951.
